# Supplementary material for: π-Conjugated macrocycles from thiophenes and benzenes
Source: Royal Society of Chemistry journal article supplement (doi:10.1039/b715553k), 2008-01-01
Supplement: b715553k.pdf [file b715553k.pdf]

## Supplementary Material for:

### $\pi$ -Conjugated Macrocycles From Thiophenes and Benzenes

J. Sreedhar Reddy<sup>a</sup> and Venkataramanarao G. Anand<sup>b</sup>

<sup>a</sup>Chemical Sciences & Technology Division,  
National Institute for Interdisciplinary Science & Technology, NIST (Formerly RRL  
Trivandrum) CSIR, Trivandrum-695019,  
India.

<sup>b</sup>Department of Chemistry,  
Indian Institute of Science Education & Research, (IISER)  
900, NCL Innovation Park, Dr. Homi Bhabha Road,  
Pune - 411 008. Fax: +91-20-25898022; Tel: +91-20-25898021; India.  
E-mail: vg.anand@iiserpune.ac.in

#### General notes and procedure:

<sup>1</sup>H NMR spectra were recorded on a 300 MHz Bruker Advance DPX spectrometer. Chemical shifts ( $\delta$ ) are reported in parts per million (ppm) relative to residual solvent (CHCl<sub>3</sub>, s,  $\delta$ , 7.26). Mass spectroscopic analysis was carried out on JEOL JMS 600H spectrometer. Electronic spectra were recorded on a Perkin-Elmer Lambda 20 spectrophotometer. Chromatographic separations were performed on basic alumina and silica gel (100-200) in glass columns.

**Single Crystal Structure Determination:** The single crystal X-ray diffraction data were collected on a Bruker AXS Kappa Apex 2 CCD diffractometer at 173(2) K.

#### **References:**

Altomare, A., Gasparano, G., Giacobozzo, C., Guagliardi, A. (1993). SIR92. *J. Appl. Cryst.* 26, 343-350.

Blessing, R. (1995). *Acta Cryst.* A51, 33-38.

Bruker-Nonius (2004). APEX-II and SAINT-Plus (Version 7.06a), Bruker AXS Inc., Madison, Wisconsin, USA.

Bruker (1999). SADABS, Bruker AXS Inc., Madison, Wisconsin, USA.

Farrugia, L. J. (1999). WinGX. *J. Appl. Cryst.* 32, 837-838

Farrugia, L. J. (1997). ORTEP3 for windows. *J. Appl. Cryst.* 30, 565.

Sheldrick, G. M. (1997). SHELXL97. University of Göttingen, Germany.

Spek, A. L. (1990) *Acta Cryst.* A46, C34

Spek, A. L. (2003). *J. Appl. Cryst.* 36, 7-13.

## Synthesis & Spectral data for 1,2,3 & 6

Thiophene and all aldehydes were purchased from Sigma-Aldrich and used as such. Synthesis was carried out under an inert atmosphere using standard Schlenk line techniques. Dry  $\text{CH}_2\text{Cl}_2$  was used throughout. All other reagents were used as received unless otherwise specified.

### Synthetic Procedure for 1:

A solution of 1,4-bis(pentafluorophenylhydroxy methyl) benzene, **5**, (235 mg, 0.5 mmol) and 2,5-bis((pentafluorophenyl)(thiophen-2-yl)methyl)thiophene, **3**, (304 mg, 0.5 mmol) in 100 ml of dry dichloromethane was placed in 250 ml flask under nitrogen.  $\text{BF}_3 \cdot \text{OEt}_2$  (0.03 ml, 0.25 mmol) was added under dark, and the resulting solution was stirred for 2h. After adding excess  $\text{FeCl}_3$ , solution was opened to air and stirred for 2 more hrs. The reaction mixture was washed with water and passed through a short alumina column. This mixture was separated by silica gel column chromatography by using  $\text{CH}_2\text{Cl}_2/n$ -hexane as eluant. Light pink color fraction was obtained; it was repeatedly purified by silica gel column chromatography by using 5%  $\text{CH}_2\text{Cl}_2$  in  $n$ -hexane as eluant. (Scheme – a)

$^1\text{H NMR}$  (300MHz,  $\text{CDCl}_3$ , 298K):  $\delta = 7.53$  (s, 4H),  $\delta = 6.69$  (d,  $J = 6.0\text{Hz}$ , 2H),  $\delta = 6.59$  (d,  $J = 6.0\text{Hz}$ , 2H),  $\delta = 6.47$  (s, 2H); **UV-Vis** ( $\text{CH}_2\text{Cl}_2$ ):  $\lambda_{\text{max}}(\epsilon) = 398 (4.3 \times 10^4)$ ,  $543 (0.6 \times 10^4)$ ,  $569(0.6 \times 10^4)$ ; **FAB MS**  $m/z$ : Calcd For  $\text{C}_{46}\text{H}_{10}\text{F}_{20}\text{S}_3$  1038.74; Observed 1040 (100.0%,  $M+1$ ).

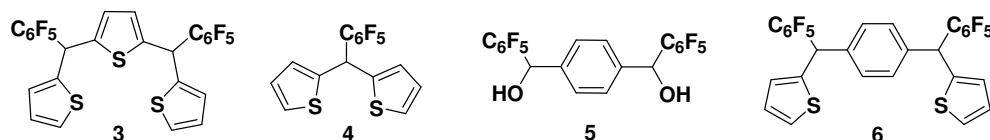

Scheme - a

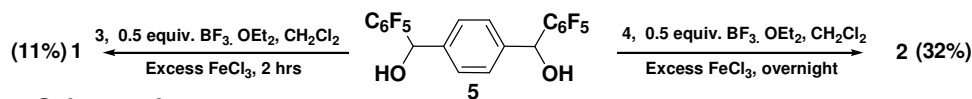

Scheme - b

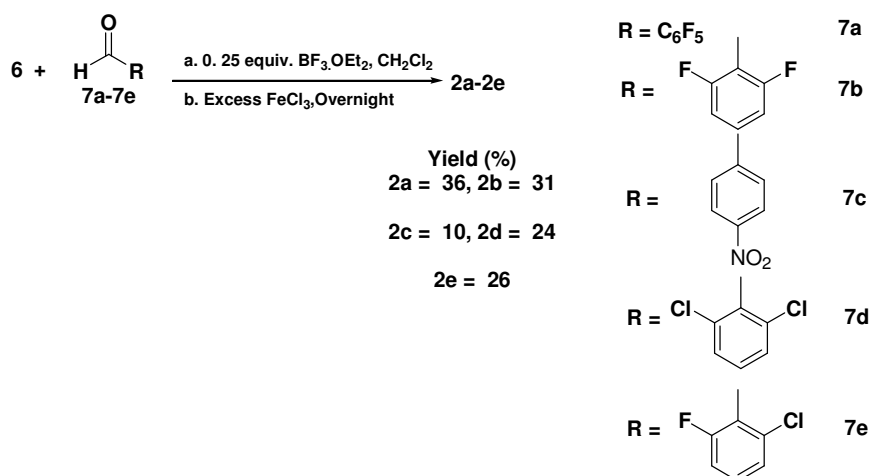

### Synthetic Procedure for 2: (Scheme – a)

A solution of 5-pentafluorophenyldithienylmethane, **4**, (173 mg, 0.5 mmol) and 1,4-bis(pentafluorophenylhydroxy methyl)benzene, **5**, (235 mg, 0.5 mmol) in 100 ml of dry dichloromethane was placed in 250 ml flask under nitrogen.  $\text{BF}_3 \cdot \text{OEt}_2$  (0.03 ml, 0.25 mmol) was added under dark, and the resulting solution was stirred for 2h. After adding excess  $\text{FeCl}_3$ , solution was opened to air and stirred for overnight (12 hrs). The reaction mixture was washed with water and passed through a short alumina column. This mixture was separated by silica gel column chromatography by using  $\text{CH}_2\text{Cl}_2/\text{n-hexane}$  as eluant. Pink color fraction was obtained; it was repeatedly purified by silica gel column chromatography by using 10%  $\text{CH}_2\text{Cl}_2$  in n-hexane as eluant.

### Synthetic Procedure for 2: (Scheme – b)

A solution of aldehyde (**7a–e**) (0.25 mmol) and 1,4-bis((pentafluorophenyl)(thiophen-2-yl)methyl)benzene (150.5 mg, 0.25 mmol) in 100 ml of dry dichloromethane was placed in 250 ml flask under nitrogen.  $\text{BF}_3 \cdot \text{OEt}_2$  (0.008 ml, 0.0625 mmol) was added under dark, and the resulting solution was stirred for 2h. After adding excess  $\text{FeCl}_3$ , solution was opened to air and stirred for overnight (12hrs). The reaction mixture was washed with water and passed through a short alumina column. This mixture was separated by silica gel column chromatography by using  $\text{CH}_2\text{Cl}_2/\text{n-hexane}$  as eluant. Pink color fraction was obtained; it was repeatedly purified by silica gel column chromatography by using 10%  $\text{CH}_2\text{Cl}_2$  in n-hexane as eluant.

**2a:**  $^1\text{H NMR}$  (300MHz,  $\text{CDCl}_3$ , 298K):  $\delta = 8.82$  (d,  $J=4.8\text{Hz}$ , 4H),  $\delta = 8.76$  (d,  $J=5.4\text{Hz}$ , 4H),  $\delta = 4.74$  (s, 8H); **UV-Vis** ( $\text{CH}_2\text{Cl}_2$ ):  $\lambda_{\text{max}}(\epsilon) = 520(30.2 \times 10^4)$ ,  $540(30.8 \times 10^4)$ ,  $613(4.8 \times 10^4)$ ,  $664(6.8 \times 10^4)$ ,  $721(13.1 \times 10^4)$ ; **FAB MS** m/z: Calcd for  $\text{C}_{70}\text{H}_{16}\text{F}_{30}\text{S}_4$  1553.97; Observed 1555(100.0%, M+1).

**2b:**  $^1\text{H NMR}$  (300MHz,  $\text{CDCl}_3$ , 298K):  $\delta = 9.0$  (d,  $J=5.4\text{Hz}$ , 4H),  $\delta = 8.9$  (d,  $J=4.8\text{Hz}$ , 4H),  $\delta = 7.88$  (m, 2H),  $\delta = 7.48$  (m, 4H),  $\delta = 4.53$  (s, 8H); **UV-Vis** ( $\text{CH}_2\text{Cl}_2$ ):  $\lambda_{\text{max}}(\epsilon) = 521(19.9 \times 10^4)$ ,  $541(20.7 \times 10^4)$ ,  $614(1.3 \times 10^4)$ ,  $666(2 \times 10^4)$ ,  $722(4.2 \times 10^4)$ ; **FAB MS** m/z: Calcd for  $\text{C}_{70}\text{H}_{22}\text{F}_{24}\text{S}_4$  1447.15; Observed 1448(100.0%, M+1).

**2c:**  $^1\text{H NMR}$  (300MHz,  $\text{CDCl}_3$ , 298K):  $\delta = 8.73$  (m, 12H),  $\delta = 8.40$  (d,  $J=8.4\text{Hz}$ , 4H),  $\delta = 4.72$  (s, 8H); **UV-Vis** ( $\text{CH}_2\text{Cl}_2$ ):  $\lambda_{\text{max}}(\epsilon) = 529(17.7 \times 10^4)$ ,  $543(19.2 \times 10^4)$ ,  $727(3.9 \times 10^4)$ ; **FAB MS** m/z: Calcd for  $\text{C}_{70}\text{H}_{24}\text{F}_{20}\text{N}_2\text{O}_4\text{S}_4$  1465.18; Observed 1466 (100.0%, M+1).

**2d:**  $^1\text{H NMR}$  (300MHz,  $\text{CDCl}_3$ , 298K):  $\delta = 9.0$  (d,  $J=5.4\text{Hz}$ , 4H),  $\delta = 8.9$  (d,  $J=4.8\text{Hz}$ , 4H),  $\delta = 7.90$  (d,  $J=8.4\text{Hz}$ , 4H),  $\delta = 7.79$  (m, 2H),  $\delta = 4.51$  (s, 8H); **UV-Vis** ( $\text{CH}_2\text{Cl}_2$ ):  $\lambda_{\text{max}}(\epsilon) = 524(17.6 \times 10^4)$ ,  $543(20 \times 10^4)$ ,  $725(4.1 \times 10^4)$ ; **FAB MS** m/z: Calcd for  $\text{C}_{70}\text{H}_{22}\text{Cl}_4\text{F}_{20}\text{S}_4$  1510.90; Observed 1512 (100.0%, M+1).

**2e:**  $^1\text{H NMR}$  (300MHz,  $\text{CDCl}_3$ , 298K):  $\delta = 9.0$  (d,  $J=4.5\text{Hz}$ , 4H),  $\delta = 8.9$  (d,  $J=5.4\text{Hz}$ , 4H),  $\delta = 7.81$  (m, 4H),  $\delta = 7.60$  (m, 2H),  $\delta = 4.50$  (s, 8H); **UV-Vis** ( $\text{CH}_2\text{Cl}_2$ ):  $\lambda_{\text{max}}(\epsilon) = 522(17.1 \times 10^4)$ ,  $542(17.8 \times 10^4)$ ,  $724(3.6 \times 10^4)$ ; **FAB MS**  $m/z$ : Calcd. for  $\text{C}_{70}\text{H}_2\text{Cl}_2\text{F}_{22}\text{S}_4$  1480.05; Observed 1481(100.0%,  $\text{M}+1$ ).

**Synthetic procedure for 3(2,5-bis((pentafluorophenyl)(thiophen-2yl)methyl)thiophene):**

A mixture of 2, 5-(pentafluorophenylhydroxy methyl) thiophene (238 mg, 0.5 mmol) and thiophene (3.0 ml, 37 mmol) was degassed with argon for 10 min, then  $\text{BF}_3 \cdot \text{O}(\text{Et})_2$  (0.06 ml, 0.5 mmol) was added. The resulting solution was stirred at room temperature and the progress of the reaction was carefully monitored by TLC (~ 30 min), the mixture was poured in to  $\text{CH}_2\text{Cl}_2$  (50 ml) and washed with aqueous NaOH (0.1 N). The organic layer was washed with water and dried ( $\text{MgSO}_4$ ). The excess thiophene and solvent was removed in vacuum and resulting solid was chromatographed on silica (1% EtOAc in hexane) the desired product obtained as light yellow solid. Yield 216 mg (71%).

$^1\text{H NMR}$  (300MHz,  $\text{CDCl}_3$ , 298K):  $\delta = 7.23$  (m, 2H),  $\delta = 6.94$  (m, 4H),  $\delta = 6.78$  (s, 2H),  $\delta = 6.15$  (s, 2H). **FAB MS**  $m/z$ : Calcd for  $\text{C}_{26}\text{H}_{10}\text{F}_{10}\text{S}_3$  607.98; Observed 608.1(20.0%,  $\text{M}+1$ ).

**Synthetic procedure for 6(1,4 -bis((pentafluorophenyl)(thiophen-2-yl)methyl)benzene):**

A mixture of 1,4 - bis (perfluorophenylhydroxymethyl)benzene(235 mg, 0.5 mmol) and thiophene (3.0 ml, 37 mmol) was degassed with argon for 10min, then  $\text{BF}_3 \cdot \text{O}(\text{Et})_2$  (0.06 ml, 0.5 mmol) was added. The resulting solution was stirred at room temperature and the progress of the reaction was carefully monitored by TLC (~ 30 min), the mixture was poured in to  $\text{CH}_2\text{Cl}_2$  (50 ml) and washed with aqueous NaOH (0.1N). The organic layer was washed with water and dried ( $\text{MgSO}_4$ ). The excess thiophene and solvent was removed in vacuum and resulting solid was chromatographed on silica (1% EtOAc in hexane) the desired product obtained as white solid. Yield 185 mg (61%).

$^1\text{H NMR}$  (300MHz,  $\text{CDCl}_3$ , 298K):  $\delta = 7.23$  (m, Phenyl 4H and thiophene -2H),  $\delta = 6.95$  (m, thiophene - 2H),  $\delta = 6.78$  (d,  $J=3\text{Hz}$ , thiophene  $\alpha$ -2H)  $\delta = 6.01$  (s, *meso* - 2H). **FAB MS**  $m/z$ : Calcd for  $\text{C}_{28}\text{H}_{12}\text{F}_{10}\text{S}_2$  602.02; Observed 601.04(20.0%,  $\text{M}-1^+$ ).

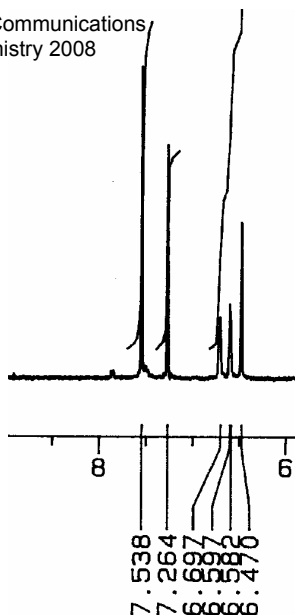

**$^1\text{H}$  NMR Spectrum of 1 in  $\text{CDCl}_3$  at 298K**

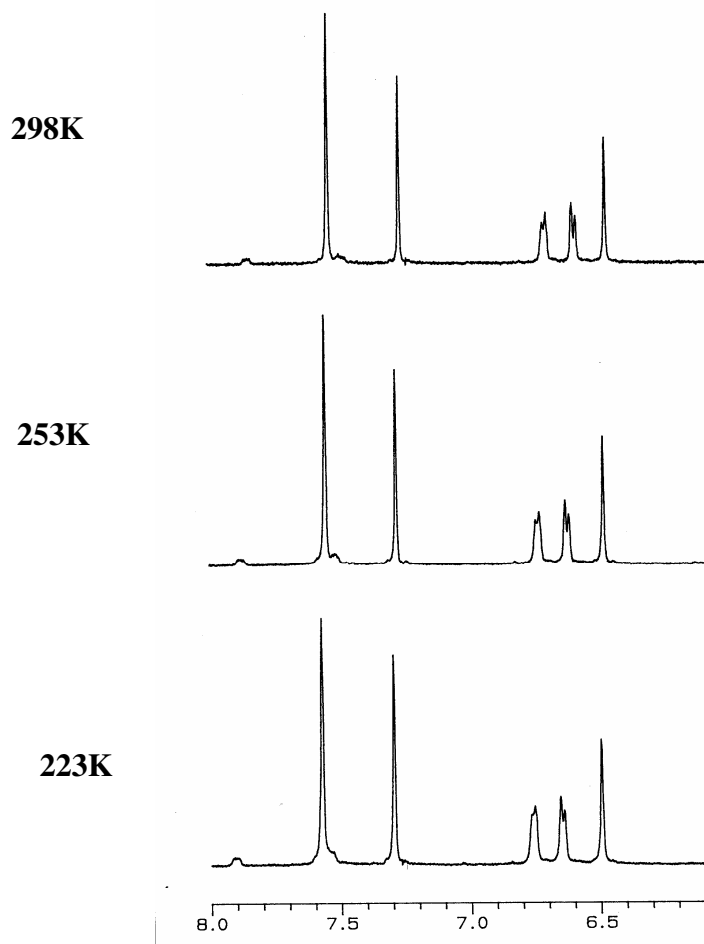

**Variable temperature  $^1\text{H}$  NMR Spectrum of 1 in  $\text{CDCl}_3$**

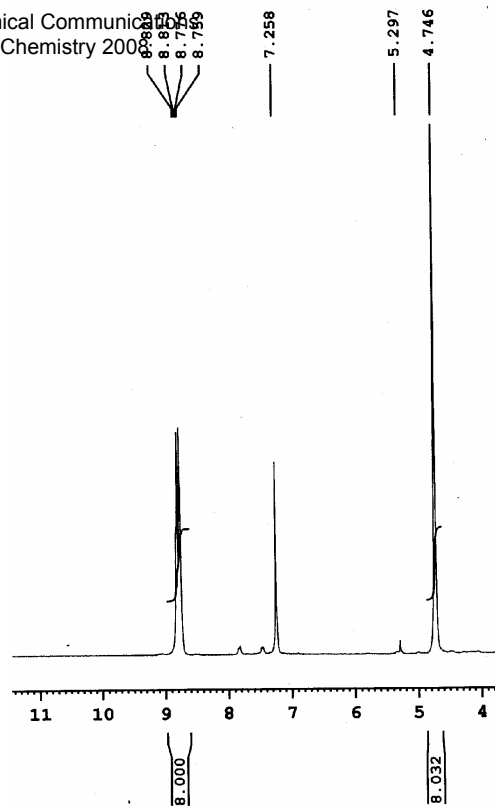

**$^1\text{H}$  NMR Spectrum of 2a in  $\text{CDCl}_3$ :**

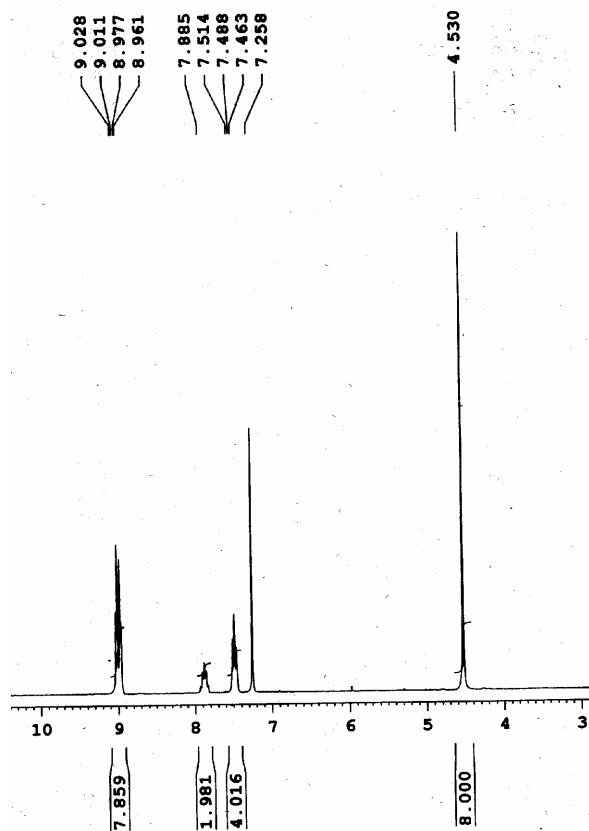

**$^1\text{H}$  NMR Spectrum of 2b in  $\text{CDCl}_3$ :**

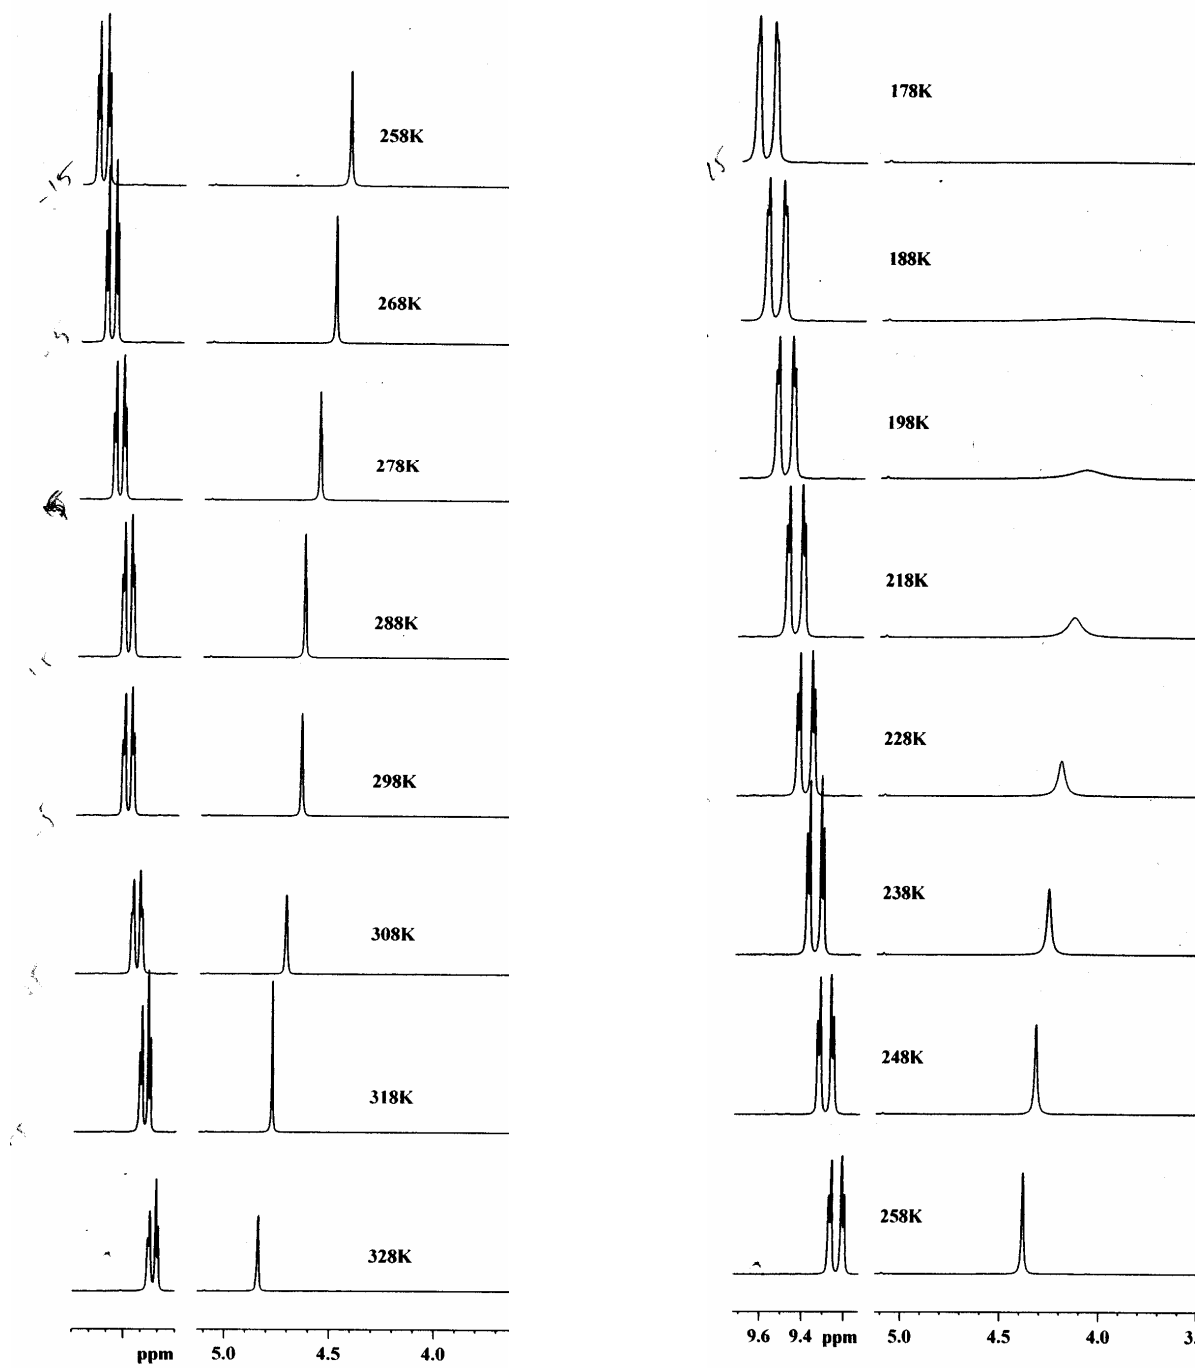

Variable temperature  $^1\text{H}$  NMR Spectrum of 2a in  $\text{CD}_2\text{Cl}_2$ :

[ Mass Spectrum ]  
Data : 7E29MARCH629 Date : 29-Mar-2007 11:29  
Sample: I DR V G ANAND RRL THIRUVANTHURAM #1435  
Note : -  
Inlet : Direct Ion Mode : FAB+  
Spectrum Type : Normal Ion [MF-Linear]  
RT : 0.37 min Scan# : (4,5)  
BP : m/z 1040.0000 Int. : 87.78  
Output m/z range : 75.4451 to 1238.6499 Cut Level : 0.00 %

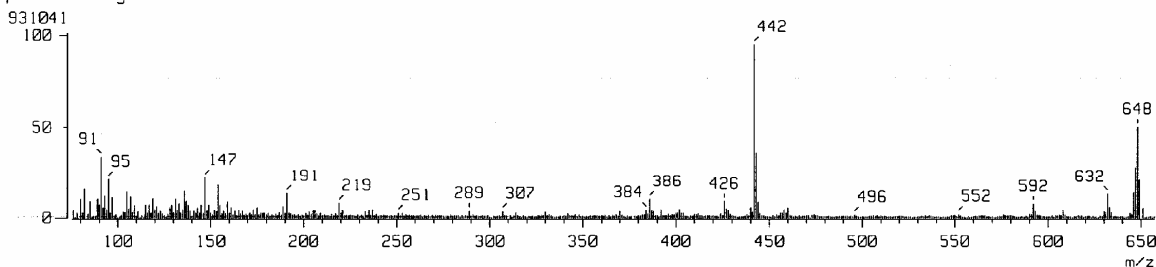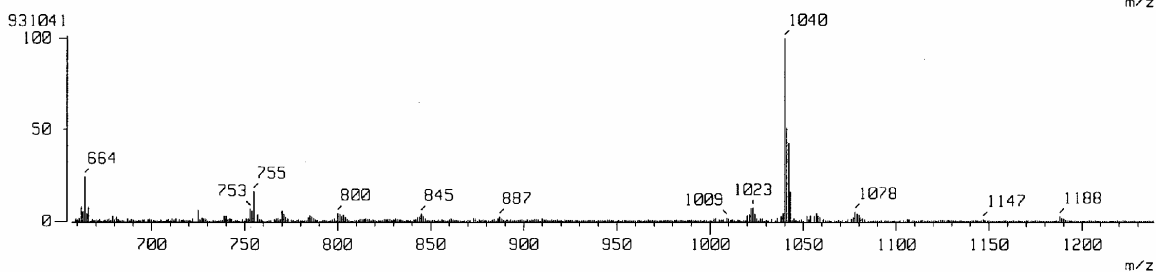

**FAB Mass spectrum of 1**

[ Mass Spectrum ]  
Data : 6I04AUG093 Date : 04-Aug-2006 10:02  
Sample: B DR V G ANAND RRL TRIVENDRUM  
Note : -  
Inlet : Direct Ion Mode : FAB+  
Spectrum Type : Normal Ion [MF-Linear]  
RT : 0.72 min Scan# : (4,5)  
BP : m/z 154.0000 Int. : 100.00  
Output m/z range : 82.7151 to 1798.4421 Cut Level : 0.00 %

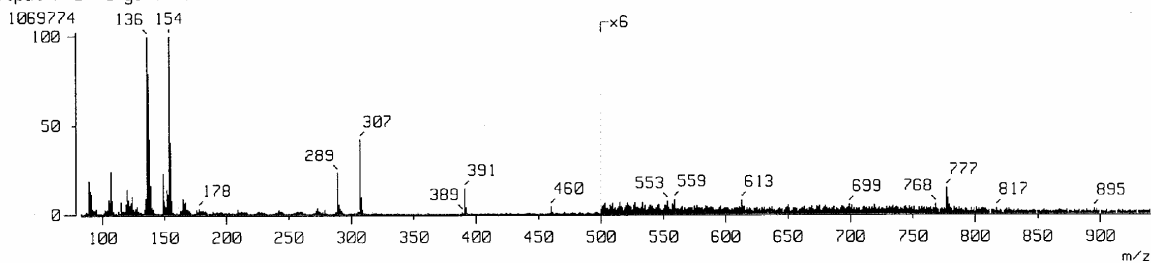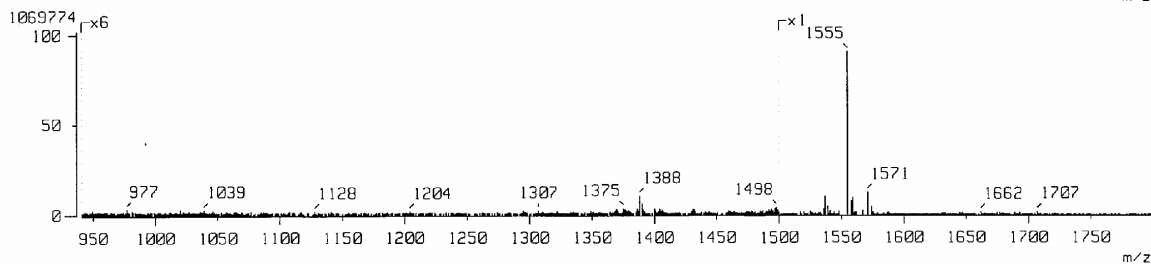

**FAB Mass spectrum of 2a**



[ Mass Spectrum ]  
Data : 7E29MARCH632 Date : 29-Mar-2007 11:59  
Sample: B3 DR V G ANAND RRL THIRUVANTHURAM #1435  
Note : -  
Inlet : Direct Ion Mode : FAB+  
Spectrum Type : Normal Ion [MF-Linear]  
RT : 0.49 min Scan# : (4,6)  
BP : m/z 1448.0000 Int. : 64.51  
Output m/z range : 79.0001 to 1714.8368 Cut Level : 0.00 %

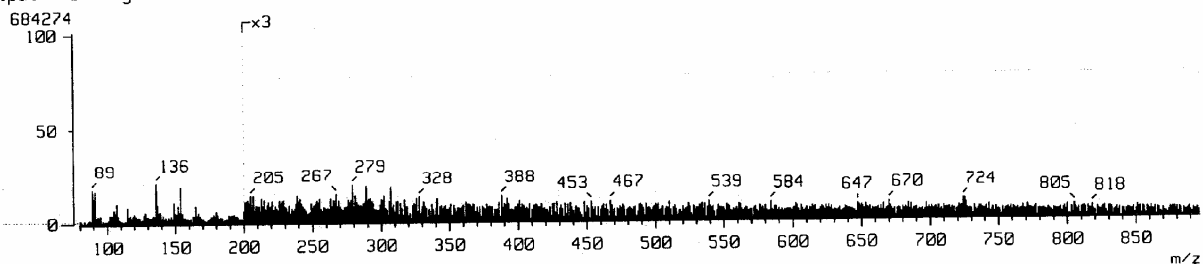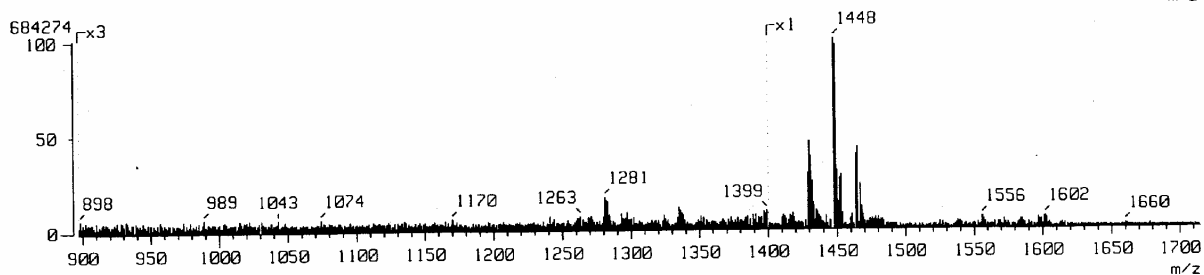

**FAB Mass spectrum of 2b**

**F...F Non-bonded interactions in 2b**

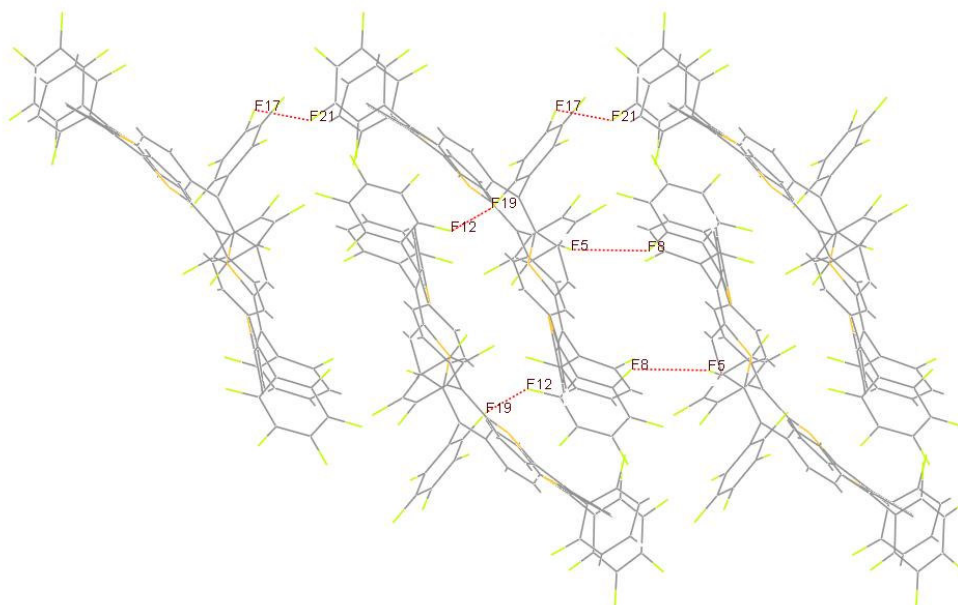

F19...F12 (2.813Å); F17...F21 (2.697Å); F8...F5 (2.829Å).
